# Supplementary material for: Targeting the p53 pathway to treat Malignant Rhabdoid and Atypical Teratoid Rhabdoid Tumors
Source: Research Square preprint supplement (doi:10.21203/rs.3.rs-2094243/v1), 2022-10-06
Supplement: Supplementary file 1 [file 23aa6190f1151c03a296cf7d.xlsx]

## Sheet: A204
Supplementary Table S2A. Preclinical study using selinexor and idasanutlin in A204 xenograft models.
Mouse ID	1Treatment Group	Reason Off Study	Tx Duration (Days)	Response	2Enrollment	Course 1 wk 1	Course 1 wk 2	Course 1 wk 3	Course 1 wk 4	Course 2 wk 1	Course 2 wk 2	Course 2 wk 3	Course 2 wk 4	Course 3 wk 1	Course 3 wk 2	Course 3 wk 3	Course 3 wk 4	Course 4 wk 1	Course 4 wk 2	Course 4 wk 3	End of Study Course 4 wk 4	Week 17	Week 18	Week 19	Week 20	Week 21	Week 22	Week 23	Week 24	Week 25	Week 26	Week 27	Week 28	Week 29	Week 30	Week 31	Week 32	Week 33	Week 34	Week 35	Week 36	Week 37	Week 38	Week 39	Week 40	Week 41	Week 42
426	Vehicle	Tumor Burden	26	PD	1910000000	2050000000	3910000000	6610000000	9300000000	X	X	X	X	X	X	X	X	X	X	X	X	X	X	X	X	X	X	X	X	X	X	X	X	X	X	X	X	X	X	X	X	X	X	X	X	X	X
407	Vehicle	Tumor Burden	29	PD	912000000	1940000000	1680000000	8950000000	7080000000	X	X	X	X	X	X	X	X	X	X	X	X	X	X	X	X	X	X	X	X	X	X	X	X	X	X	X	X	X	X	X	X	X	X	X	X	X	X
446	Vehicle	Tumor Burden	32	PD	260000000	234000000	627000000	1470000000	2260000000	2360000000	X	X	X	X	X	X	X	X	X	X	X	X	X	X	X	X	X	X	X	X	X	X	X	X	X	X	X	X	X	X	X	X	X	X	X	X	X
406	Vehicle	Tumor Burden	58	PD	258000000	571000000	673000000	1210000000	1540000000	1060000000	1290000000	859000000	615000000	X	X	X	X	X	X	X	X	X	X	X	X	X	X	X	X	X	X	X	X	X	X	X	X	X	X	X	X	X	X	X	X	X	X
414	Vehicle	Tumor Burden	66	PD	302000000	583000000	888000000	3450000000	1640000000	2820000000	1780000000	1150000000	1540000000	1080000000	2490000000	X	X	X	X	X	X	X	X	X	X	X	X	X	X	X	X	X	X	X	X	X	X	X	X	X	X	X	X	X	X	X	X
424	Vehicle	Tumor Burden	80	PD	364000000	694000000	831000000	2030000000	2150000000	1660000000	1020000000	733000000	637000000	4220000000	2510000000	2990000000	1610000000	X	X	X	X	X	X	X	X	X	X	X	X	X	X	X	X	X	X	X	X	X	X	X	X	X	X	X	X	X	X
413	Vehicle	Tumor Burden	87	PD	84800000	250000000	317000000	311000000	406000000	606000000	611000000	1370000000	2510000000	3980000000	4780000000	3040000000	3460000000	5030000000	X	X	X	X	X	X	X	X	X	X	X	X	X	X	X	X	X	X	X	X	X	X	X	X	X	X	X	X	X
430	Idasanutlin	Tumor Burden	32	PD	457000000	2530000000	1010000000	5440000000	6490000000	X	X	X	X	X	X	X	X	X	X	X	X	X	X	X	X	X	X	X	X	X	X	X	X	X	X	X	X	X	X	X	X	X	X	X	X	X	X
431	Idasanutlin	Tumor Burden	43	PD	981000000	1970000000	1370000000	4000000000	1740000000	2390000000	1020000000	X	X	X	X	X	X	X	X	X	X	X	X	X	X	X	X	X	X	X	X	X	X	X	X	X	X	X	X	X	X	X	X	X	X	X	X
445	Idasanutlin	Tumor Burden	72	PD	156000000	178000000	289000000	810000000	606000000	1070000000	1150000000	817000000	793000000	1530000000	2200000000	X	X	X	X	X	X	X	X	X	X	X	X	X	X	X	X	X	X	X	X	X	X	X	X	X	X	X	X	X	X	X	X
425	Idasanutlin	Tumor Burden	80	PD	425000000	673000000	274000000	728000000	1180000000	2320000000	1670000000	3990000000	2660000000	5520000000	6710000000	10600000000	12800000000	X	X	X	X	X	X	X	X	X	X	X	X	X	X	X	X	X	X	X	X	X	X	X	X	X	X	X	X	X	X
409	Idasanutlin	Completed Therapy	112	CT; CR	7040000	271000	219000	773000	607000	394000	158000	326000	254000	637000	836000	1380000	1680000	1270	699	902	806	822	721	871	1370	1370	1390	1270	1330	1530	1500	1220	1070	1120	1280	1340	1390	1270	1227	1160	1670	1220	1110	1180	1290	1120	1560
410	Idasanutlin	Completed Therapy	112	CT; CR	64900000	119000000	199000000	187000000	132000000	66100000	9580000	1480000	1070000	2090000	2440000	5230000	5190000	715	634	812	589	678	617	706	940	999	983	967	817	1080	841	884	1140	1120	1040	911	931	1070	1043	976	1400	994	1200	1110	1200	987	1430
439	Idasanutlin	Completed Therapy	112	CT; PD	159000000	156000000	53700000	24400000	25400000	61700000	11100000	15000000	31500000	72300000	58100000	122000000	133000000	148000000	64600000	204000000	228000000	198000000	168000000	329000000	355000000	268000000	264000000	299000000	183000000	745000000	171000000	X	X	X	X	X	X	X	X	X	X	X	X	X	X	X	X
401	Selinexor 10mg/kg 2x a week	Tumor Burden	43	PD	292000000	22400000	940000000	1570000000	2230000000	4400000000	1250000000	X	­	­	­	­	­	­	­	­	­	X	X	X	X	X	X	X	X	X	X	X	X	X	X	X	X	X	X	X	X	X	X	X	X	X	X
412	Selinexor 10mg/kg 2x a week	Tumor Burden	43	PD	181000000	195000000	169000000	535000000	955000000	699000000	1430000000	­	­	­	­	­	­	­	­	­	­	X	X	X	X	X	X	X	X	X	X	X	X	X	X	X	X	X	X	X	X	X	X	X	X	X	X
422	Selinexor 10mg/kg 2x a week	Tumor Burden	80	PD	181000000	83500000	133000000	192000000	292000000	624000000	319000000	510000000	598000000	1200000000	2010000000	3240000000	3030000000	­	­	­	­	X	X	X	X	X	X	X	X	X	X	X	X	X	X	X	X	X	X	X	X	X	X	X	X	X	X
441	Selinexor 10mg/kg 2x a week	Tumor Burden	95	PD	188000000	306000000	401000000	282000000	999000000	2770000000	2760000000	2650000000	4000000000	2290000000	3450000000	2550000000	2380000000	5020000000	­	­	­	X	X	X	X	X	X	X	X	X	X	X	X	X	X	X	X	X	X	X	X	X	X	X	X	X	X
443	Selinexor 10mg/kg 2x a week	Completed Therapy	112	CT; CR	335000000	511000000	17900000	212000000	105000000	23700000	383000	2340	1020	1260	1980	1720	1200	1500	1040	1660	836	747	916	978	1190	1360	1420	1490	1070	1450	1550	1530	1410	1190	914	1350	1100	1360	2722	31900	11700	6250	15000	11000	1030	23200	1230
442	Selinexor 10mg/kg 2x a week	Moribund, not due to tumor	33	-	460000000	1570000000	1250000000	3750000000	1470000000	1010000000
411	Selinexor 10mg/kg 2x a week	Moribund, not due to tumor	47	-	140000000	212000000	200000000	565000000	839000000	1570000000	382000000	533000000
447	Selinexor 15mg/kg 1x a week	Tumor Burden	29	PD	1690000000	1770000000	2110000000	7100000000	3230000000	­	­	­	­	­	­	­	­	­	­	­	­	X	X	X	X	X	X	X	X	X	X	X	X	X	X	X	X	X	X	X	X	X	X	X	X	X	X
417	Selinexor 15mg/kg 1x a week	Tumor Burden	43	PD	235000000	765000000	844000000	1510000000	1520000000	1700000000	1270000000	752000000	­	­	­	­	­	­	­	­	­	X	X	X	X	X	X	X	X	X	X	X	X	X	X	X	X	X	X	X	X	X	X	X	X	X	X
438	Selinexor 15mg/kg 1x a week	Tumor Burden	58	PD	130000000	119000000	133000000	436000000	467000000	495000000	295000000	203000000	450000000	­	­	­	­	­	­	­	­	X	X	X	X	X	X	X	X	X	X	X	X	X	X	X	X	X	X	X	X	X	X	X	X	X	X
418	Selinexor 15mg/kg 1x a week	Tumor Burden	72	PD	107000000	191000000	254000000	685000000	377000000	1040000000	1480000000	402000000	355000000	731000000	3180000000	­	­	­	­	­	­	X	X	X	X	X	X	X	X	X	X	X	X	X	X	X	X	X	X	X	X	X	X	X	X	X	X
437	Selinexor 15mg/kg 1x a week	Tumor Burden	72	PD	64300000	194000000	266000000	177000000	217000000	318000000	208000000	487000000	391000000	494000000	985000000	­	­	­	­	­	­	X	X	X	X	X	X	X	X	X	X	X	X	X	X	X	X	X	X	X	X	X	X	X	X	X	X
408	Selinexor 15mg/kg 1x a week	Completed Therapy	112	CT; SD	5240000	28900000	14500000	24400000	11500000	25700000	15100000	42200000	55300000	127000000	141000000	182000000	68300000	67100000	56600000	24800000	12800000	7330000	235000	99800	1510	5480	52000	21100	163000	638000	682000	1720000	4080000	19600000	36500000	12900000	17400000	2500000	23370000	28400000	20000000	21000000	20700000	13900000	59300000	86800000	113000000
423	Selinexor 15mg/kg 1x a week	Completed Therapy	112	CT; PD	68500000	154000000	103000000	40600000	10900000	25000000	12000000	1110000	4190000	18000000	47400000	234000000	202000000	240000000	316000000	237000000	428000000	405000000	336000000	606000000	X	X	X	X	X	X	X	X	X	X	X	X	X	X	X	X	X	X	X	X	X	X	X
435	Selinexor 1x a week + Idasanutlin	Tumor Burden	29	PD	2750000000	2620000000	1870000000	5000000000	2180000000	­	­	­	­	­	­	­	­	­	­	­	­	X	X	X	X	X	X	X	X	X	X	X	X	X	X	X	X	X	X	X	X	X	X	X	X	X	X
427	Selinexor 1x a week + Idasanutlin	Tumor Burden	43	PD	1130000000	2150000000	789000000	4780000000	6910000000	8540000000	2640000000	­	­	­	­	­	­	­	­	­	­	X	X	X	X	X	X	X	X	X	X	X	X	X	X	X	X	X	X	X	X	X	X	X	X	X	X
432	Selinexor 1x a week + Idasanutlin	Tumor Burden	43	PD	511000000	223000000	263000000	594000000	308000000	1230000000	2500000000	­	­	­	­	­	­	­	­	­	­	X	X	X	X	X	X	X	X	X	X	X	X	X	X	X	X	X	X	X	X	X	X	X	X	X	X
404	Selinexor 1x a week + Idasanutlin	Tumor Burden	103	PD	34200000	136000000	168000000	255000000	694000000	536000000	187000000	576000000	369000000	334000000	620000000	1280000000	1730000000	1820000000	4100000000	­	­	X	X	X	X	X	X	X	X	X	X	X	X	X	X	X	X	X	X	X	X	X	X	X	X	X	X
440	Selinexor 1x a week + Idasanutlin	Completed Therapy	112	CT; CR	135000	112000	141000	346000	128000	660000	115000	1070	831	939	739	999	781	774	445	753	624	737	725	874	1170	1100	1110	957	1190	1230	1250	1200	1190	1090	1130	1250	1340	3220	5186	37500	936	5210	1150	15400	1500	31500	1420
434	Selinexor 1x a week + Idasanutlin	Moribund, not due to tumor	37	-	1020000000	1060000000	1080000000	2160000000	1940000000	1780000000
415	Selinexor 1x a week + Idasanutlin	Moribund, not due to tumor	90	-	2170000	4720000	1890000	14700000	20200000	56700000	25700000	51900000	102000000	206000000	153000000	159000000	105000000	149000000	X	X	X
428	Selinexor 2x a week + Idasanutlin	Tumor Burden	29	PD	766000000	995000000	311000000	3950000000	4150000000	­	­	­	­	­	­	­	­	­	­	­	­	X	X	X	X	X	X	X	X	X	X	X	X	X	X	X	X	X	X	X	X	X	X	X	X	X	X
416	Selinexor 2x a week + Idasanutlin	Tumor Burden	68	PD	138000000	256000000	187000000	441000000	1050000000	1600000000	1140000000	214000000	898000000	1830000000	1130000000	­	­	­	­	­	­	X	X	X	X	X	X	X	X	X	X	X	X	X	X	X	X	X	X	X	X	X	X	X	X	X	X
429	Selinexor 2x a week + Idasanutlin	Tumor Burden	72	PD	391000000	332000000	212000000	725000000	700000000	1780000000	845000000	406000000	1410000000	1570000000	1140000000	­	­	­	­	­	­	X	X	X	X	X	X	X	X	X	X	X	X	X	X	X	X	X	X	X	X	X	X	X	X	X	X
448	Selinexor 2x a week + Idasanutlin	Tumor Burden	72	PD	124000000	167000000	31800000	337000000	428000000	2380000000	1200000000	778000000	862000000	2290000000	4610000000	­	­	­	­	­	­	X	X	X	X	X	X	X	X	X	X	X	X	X	X	X	X	X	X	X	X	X	X	X	X	X	X
405	Selinexor 2x a week + Idasanutlin	Completed Therapy, Tumor >20% body weight	112	CT; PD	173000000	267000000	61400000	92000000	87600000	140000000	103000000	211000000	154000000	159000000	197000000	1250000000	681000000	699000000	348000000	1120000000	532000000	311000000	686000000	X	X	X	X	X	X	X	X	X	X	X	X	X	X	X	X	X	X	X	X	X	X	X	X
444	Selinexor 2x a week + Idasanutlin	Completed Therapy, Tumor >20% body weight	112	CT; PD	275000000	141000000	102000000	168000000	91100000	101000000	47400000	68100000	84600000	120000000	275000000	269000000	292000000	566000000	685000000	396000000	370000000	189000000	281000000	925000000	X	X	X	X	X	X	X	X	X	X	X	X	X	X	X	X	X	X	X	X	X	X	X
436	Selinexor 2x a week + Idasanutlin	Moribund, not due to tumor	5	-	80800000	120000000
1: Treatment groups (4 courses planned, all schedules based on a 28 day course)
Vehicle = Selinexor vehicle administered twice weekly [0 mg/ml]
Selinexor 10mg/kg 2x a week = Selinexor dosed at 10mg/kg oral gavage twice weekly (Monday and Thursday) for first 3 weeks of 4 week cycle [3 mg/ml]
Selinexor 15mg/kg 1x a week = Selinexor dosed at 15 mg/kg oral gavage once a week (Thursday) for first 3 weeks of 4 week cycle [3 mg/ml]
Idasanutlin = Idasanutlin dosed at 150 mg/kg oral gavage twice daily on days 1-5 for first week of 4 week cycle [15 mg/ml]
Selinexor 2x a week + Idasanutlin = Selinexor dosed at 10 mg/kg oral gavage once daily, twice a week (Monday and Thursday) for first 3 weeks of 4 week cycle [3mg/ml] and Idasanutlin dosed at 150 mg/kg oral gavage twice daily on days 1-5 for first week of 4 week cycle [15 mg/ml]
Selinexor 1x a week + Idasanutlin = Selinexor dosed at 15 mg/kg oral gavage once a week (Thursday) for first 3 weeks of 4 week cycle [3 mg/ml] and Idasanutlin dosed at 150 mg/kg oral gavage twice daily on days 1-5 for first 3 weeks of 4 week cycle [15 mg/ml]
2: Xenogen imaging
All bioluminescence signals are measured in photons/sec/cm2/sr.

## Sheet: TTC642
Supplementary Table S2B. Preclinical study using selinexor and idasanutlin in TTC642 xenograft models.
Mouse ID	1Treatment Group	Reason Off Study	Tx Duration (Days)	Response	2Enrollment	Course 1 wk 1	Course 1 wk 2	Course 1 wk 3	Course 1 wk 4	Course 2 wk 1	Course 2 wk 2	Course 2 wk 3	Course 2 wk 4	Course 3 wk 1	Course 3 wk 2	Course 3 wk 3	Course 3 wk 4	Course 4 wk 1	Course 4 wk 2	Course 4 wk 3	End of Study Course 4 wk 4	Week 17	Week 18	Week 19	Week 20	Week 21	Week 22	Week 23	Week 24	Week 25	Week 26	Week 27	Week 28	Week 29	Week 30	Week 31	Week 32	Week 33	Week 34	Week 35	Week 36	Week 37	Week 38	Week 39	Week 40	Week 41	Week 42
56	Vehicle	Tumor Burden	15	PD	228000000	233000000	474000000	X	X	X	X	X	X	X	X	X	X	X	X	X	X	X	X	X	X	X	X	X	X	X	X	X	X	X	X	X	X	X	X	X	X	X	X	X	X	X	X
57	Vehicle	Tumor Burden	29	PD	70500000	227000000	226000000	281000000	452000000	X	X	X	X	X	X	X	X	X	X	X	X	X	X	X	X	X	X	X	X	X	X	X	X	X	X	X	X	X	X	X	X	X	X	X	X	X	X
63	Vehicle	Tumor Burden	43	PD	142000000	716000000	1340000000	840000000	109000000	X	X	X	X	X	X	X	X	X	X	X	X	X	X	X	X	X	X	X	X	X	X	X	X	X	X	X	X	X	X	X	X	X	X	X	X	X	X
64	Vehicle	Tumor Burden	22	PD	139000000	245000000	394000000	656000000	X	X	X	X	X	X	X	X	X	X	X	X	X	X	X	X	X	X	X	X	X	X	X	X	X	X	X	X	X	X	X	X	X	X	X	X	X	X	X
74	Vehicle	Tumor Burden	26	PD	153000000	201000000	174000000	17500000	467000000	X	X	X	X	X	X	X	X	X	X	X	X	X	X	X	X	X	X	X	X	X	X	X	X	X	X	X	X	X	X	X	X	X	X	X	X	X	X
76	Vehicle	Tumor Burden	12	PD	944000000	717000000	902000000	X	X	X	X	X	X	X	X	X	X	X	X	X	X	X	X	X	X	X	X	X	X	X	X	X	X	X	X	X	X	X	X	X	X	X	X	X	X	X	X
96	Vehicle	Tumor Burden	29	PD	15500000	186000000	422000000	1000000000	4450000	X	X	X	X	X	X	X	X	X	X	X	X	X	X	X	X	X	X	X	X	X	X	X	X	X	X	X	X	X	X	X	X	X	X	X	X	X	X
59	Idasanutlin	Tumor Burden	43	PD	27700000	152000000	177000000	282000000	319000000	925000000	463000000	X	X	X	X	X	X	X	X	X	X	X	X	X	X	X	X	X	X	X	X	X	X	X	X	X	X	X	X	X	X	X	X	X	X	X	X
60	Idasanutlin	Tumor Burden	87	PD	116000000	97300000	30800000	88900000	364000000	438000000	193000000	206000000	411000000	224000000	294000000	169000000	474000000	198000000	X	X	X	X	X	X	X	X	X	X	X	X	X	X	X	X	X	X	X	X	X	X	X	X	X	X	X	X	X
75	Idasanutlin	Completed Therapy	112	CT; PD	7450000	8530000	2500000	3010000	14700000	26500000	5930000	8230000	14600000	19800000	17400000	9740000	25700000	12700000	48400000	27100000	979000	206000000	208000000	296000000	X	X	X	X	X	X	X	X	X	X	X	X	X	X	X	X	X	X	X	X	X	X	X
80	Idasanutlin	Tumor Burden	29	PD	36900000	218000000	239000000	129000000	833000000	X	X	X	X	X	X	X	X	X	X	X	X	X	X	X	X	X	X	X	X	X	X	X	X	X	X	X	X	X	X	X	X	X	X	X	X	X	X
81	Idasanutlin	Tumor Burden	80	PD	5070000	18700000	9210000	14600000	94200000	90600000	35400000	52700000	111000000	106000000	132000000	X	X	X	X	X	X	X	X	X	X	X	X	X	X	X	X	X	X	X	X	X	X	X	X	X	X	X	X	X	X	X	X
89	Idasanutlin	Tumor Burden	29	PD	228000000	311000000	520000000	318000000	615000000	X	X	X	X	X	X	X	X	X	X	X	X	X	X	X	X	X	X	X	X	X	X	X	X	X	X	X	X	X	X	X	X	X	X	X	X	X	X
95	Idasanutlin	Tumor Burden	22	PD	315000000	13400000	754000000	439000000	X	X	X	X	X	X	X	X	X	X	X	X	X	X	X	X	X	X	X	X	X	X	X	X	X	X	X	X	X	X	X	X	X	X	X	X	X	X	X
51	Selinexor 10mg/kg 2x a week	Tumor Burden	72	PD	17200000	226000000	575000000	401000000	172000000	1080000000	651000000	658000000	679000000	381000000	1410000000	957000000	X	X	X	X	X	X	X	X	X	X	X	X	X	X	X	X	X	X	X	X	X	X	X	X	X	X	X	X	X	X	X
61	Selinexor 10mg/kg 2x a week	Tumor Burden	68	PD	56600000	2930000	181000000	223000000	86800000	520000000	130000000	201000000	173000000	170000000	398000000	X	X	X	X	X	X	X	X	X	X	X	X	X	X	X	X	X	X	X	X	X	X	X	X	X	X	X	X	X	X	X	X
62	Selinexor 10mg/kg 2x a week	Completed Therapy	112	CT; PD	37800000	109000000	179000000	142000000	16800000	77800000	129000000	228000000	154000000	296000000	279000000	336000000	66100000	1730000	4480000	517000000	451000000	X	X	X	X	X	X	X	X	X	X	X	X	X	X	X	X	X	X	X	X	X	X	X	X	X	X
72	Selinexor 10mg/kg 2x a week	Tumor Burden	43	PD	73400000	204000000	778000000	624000000	115000000	1090000000	874000000	X	X	X	X	X	X	X	X	X	X	X	X	X	X	X	X	X	X	X	X	X	X	X	X	X	X	X	X	X	X	X	X	X	X	X	X
92	Selinexor 10mg/kg 2x a week	Tumor Burden	26	PD	156000000	226000000	1030000000	452000000	241000000	X	X	X	X	X	X	X	X	X	X	X	X	X	X	X	X	X	X	X	X	X	X	X	X	X	X	X	X	X	X	X	X	X	X	X	X	X	X
93	Selinexor 10mg/kg 2x a week	Tumor Burden	26	PD	153000000	305000000	1990000000	681000000	12600000	X	X	X	X	X	X	X	X	X	X	X	X	X	X	X	X	X	X	X	X	X	X	X	X	X	X	X	X	X	X	X	X	X	X	X	X	X	X
91	Selinexor 10mg/kg 2x a week	Moribund, not due to tumor	33	-	70300000	139000000	519000000	886000000	290000000	1040000000
58	Selinexor 15mg/kg 1x a week	Tumor Burden	15	PD	230000000	596000000	906000000	X	X	X	X	X	X	X	X	X	X	X	X	X	X	X	X	X	X	X	X	X	X	X	X	X	X	X	X	X	X	X	X	X	X	X	X	X	X	X	X
67	Selinexor 15mg/kg 1x a week	Tumor Burden	32	PD	86000000	142000000	613000000	639000000	725000000	1020000000	X	X	X	X	X	X	X	X	X	X	X	X	X	X	X	X	X	X	X	X	X	X	X	X	X	X	X	X	X	X	X	X	X	X	X	X	X
68	Selinexor 15mg/kg 1x a week	Tumor Burden	32	PD	69700000	122000000	228000000	325000000	326000000	434000000	X	X	X	X	X	X	X	X	X	X	X	X	X	X	X	X	X	X	X	X	X	X	X	X	X	X	X	X	X	X	X	X	X	X	X	X	X
73	Selinexor 15mg/kg 1x a week	Tumor Burden	32	PD	183000000	304000000	605000000	324000000	364000000	597000000	X	X	X	X	X	X	X	X	X	X	X	X	X	X	X	X	X	X	X	X	X	X	X	X	X	X	X	X	X	X	X	X	X	X	X	X	X
87	Selinexor 15mg/kg 1x a week	Tumor Burden	15	PD	326000000	521000000	1750000000	X	X	­	X	X	X	X	X	X	X	X	X	X	X	X	X	X	X	X	X	X	X	X	X	X	X	X	X	X	X	X	X	X	X	X	X	X	X	X	X
97	Selinexor 15mg/kg 1x a week	Tumor Burden	40	PD	72300000	235000000	268000000	185000000	2940000	340000000	596000000	X	X	X	X	X	X	X	X	X	X	X	X	X	X	X	X	X	X	X	X	X	X	X	X	X	X	X	X	X	X	X	X	X	X	X	X
88	Selinexor 15mg/kg 1x a week	Moribund, not due to tumor	12	-	422000000	650000000	401000000
54	Selinexor 1x a week + Idasanutlin	Completed Therapy	112	CT; PD	343000000	504000000	235000000	272000000	293000000	1440000000	70000000	125000000	309000000	353000000	478000000	212000000	1220000	89900000	1550000	3450000	3100000	2300000	471000000	109000	X	X	X	X	X	X	X	X	X	X	X	X	X	X	X	X	X	X	X	X	X	X	X
65	Selinexor 1x a week + Idasanutlin	Tumor Burden	80	PD	66100000	293000000	56500000	65800000	184000000	261000000	134000000	110000000	396000000	360000000	502000000	X	X	X	X	X	X	X	X	X	X	X	X	X	X	X	X	X	X	X	X	X	X	X	X	X	X	X	X	X	X	X	X
77	Selinexor 1x a week + Idasanutlin	Tumor Burden	58	PD	197000000	441000000	497000000	251000000	359000000	301000000	225000000	80300000	219000000	X	X	X	X	X	X	X	X	X	X	X	X	X	X	X	X	X	X	X	X	X	X	X	X	X	X	X	X	X	X	X	X	X	X
82	Selinexor 1x a week + Idasanutlin	Completed Therapy	112	CT; CR	75500000	103000000	7070000	7560000	12200000	448000	5720000	2910000	2950000	3020000	2190000	828000	149000	16600	697	1190	697	773	37100	752	620	1130	882	601	885	626	994	718	880	626	1200	706	1640	565	569	559	5160	616	-1730	-9750	-4490	4170	3340
84	Selinexor 1x a week + Idasanutlin	Completed Therapy	112	CT; CR	6090000	160000000	144000	52400	77500	131000	48000	8030	43900	29900	56500	10000	39200	10000	1730	890	898	740	674	779	695	1130	900	765	770	731	1100	781	928	808	836	1000	846	794	854	519	1030	1170	-4480	1510	4940	1490	2030
85	Selinexor 1x a week + Idasanutlin	Completed Therapy	112	CT; PD	6750000	16700000	9410000	8420000	31500000	58700000	31600000	33800000	44700000	68600000	22500000	12600000	7940000	5000000	181000	24000000	487000	43100000	21100000	X	X	X	X	X	X	X	X	X	X	X	X	X	X	X	X	X	X	X	X	X	X	X	X
90	Selinexor 1x a week + Idasanutlin	Tumor Burden	29	PD	313000000	392000000	420000000	705000000	1260000000	X	X	X	X	X	X	X	X	X	X	X	X	X	X	X	X	X	X	X	X	X	X	X	X	X	X	X	X	X	X	X	X	X	X	X	X	X	X
55	Selinexor 2x a week + Idasanutlin	Completed Therapy	112	CT; CR	11800000	27800000	217000	322000	457000	1590000	537000	196000	17300	77900	54200	45000	31400	35800	41900	48600	2210	26200	1080	-	1070	947	857	827	929	713	796	821	685	582	623	723	929	1110	582	750	1710	13100	3230	306	8070	2300	4560
66	Selinexor 2x a week + Idasanutlin	Completed Therapy	112	CT; PD	92600000	180000000	18300000	15300000	9380000	33000000	4250000	6170000	19800000	40700000	6280000	9260000	345000	253000	18400000	37300000	159000	93500000	1020000	201000000	X	X	X	X	X	X	X	X	X	X	X	X	X	X	X	X	X	X	X	X	X	X	X
79	Selinexor 2x a week + Idasanutlin	Tumor Burden	29	PD	247000000	1490000000	138000000	604000000	481000000	X	X	X	X	X	X	X	X	X	X	X	X	X	X	X	X	X	X	X	X	X	X	X	X	X	X	X	X	X	X	X	X	X	X	X	X	X	X
86	Selinexor 2x a week + Idasanutlin	Completed Therapy	112	CT; PD	747000000	1990000000	282000000	273000000	517000000	1420000000	484000000	481000000	805000000	1950000000	1410000000	1880000000	1740000000	703000000	1150000000	427000000	3340000000	X	X	X	X	X	X	X	X	X	X	X	X	X	X	X	X	X	X	X	X	X	X	X	X	X	X
94	Selinexor 2x a week + Idasanutlin	Completed Therapy	112	CT; CR	123000000	427000000	43100000	20500000	50400000	92600000	7690000	3110000	335000	36400	2670	6170	2060	1110	790	773	514	1290	829	877	938	1110	1430	929	1410	597	1120	811	1020	1090	845	744	1250	1010	1100	976	3530	3840	3430	589	7800	1290	X
98	Selinexor 2x a week + Idasanutlin	Tumor Burden	87	PD	76000000	126000000	22700000	37900000	164000000	411000000	280000000	316000000	260000000	517000000	274000000	2380000	2930000	1310000000	X	X	X	X	X	X	X	X	X	X	X	X	X	X	X	X	X	X	X	X	X	X	X	X	X	X	X	X	X
78	Selinexor 2x a week + Idasanutlin	Moribund, not due to tumor	8	-	172000000	373000000
1: Treatment groups (4 courses planned, all schedules based on a 28 day course)
Vehicle = Selinexor vehicle administered twice weekly [0 mg/ml]
Selinexor 10 mg/kg 2x a week = Selinexor dosed at 10 mg/kg oral gavage twice weekly (Monday and Thursday) for first 3 weeks of 4 week cycle [3 mg/ml]
Selinexor 15mg/kg 1x a week = Selinexor dosed at 15 mg/kg oral gavage once a week (Thursday) for first 3 weeks of 4 week cycle [3 mg/ml]
Idasanutlin = Idasanutlin dosed at 150 mg/kg oral gavage twice daily on days 1-5 for first week of 4 week cycle [15 mg/ml]
Selinexor 2x a week + Idasanutlin = Selinexor dosed at 10 mg/kg oral gavage once daily, twice a week (Monday and Thursday) for first 3 weeks of 4 week cycle [3 mg/ml] and Idasanutlin dosed at 150 mg/kg oral gavage twice daily on days 1-5 for first week of 4 week cycle [15 mg/ml]
Selinexor 1x a week + Idasanutlin = Selinexor dosed at 15 mg/kg oral gavage once a week (Thursday) for first 3 weeks of 4 week cycle [3 mg/ml] and Idasanutlin dosed at 150 mg/kg oral gavage twice daily on days 1-5 for first 3 weeks of 4 week cycle [15 mg/ml]
2: Xenogen imaging
All bioluminescence signals are measured in photons/sec/cm2/sr.

## Sheet: BT16
Supplementary Table S2C. Preclinical study using selinexor and idasanutlin in BT16 xenograft models.
Mouse ID	1Treatment Group	Reason Off Study	Tx Duration (Days)	Response	2Enrollment Course 1 wk 1	Course 1 wk 2	Course 1 wk 3	Course 1 wk 4	Course 2 wk 1	Course 2 wk 2	Course 2 wk 3	Course 2 wk 4
39910	Control	Tumor Burden	21	PD	5253000	143400000	545700000	1519000000
39917	Control	Tumor Burden	21	PD	5353000	13180000	272700000	1127000000
39927	Control	Tumor Burden	21	PD	9929000	370100000	184500000	886500000
39911	Control	Tumor Burden	28	PD	32260000	329600000	254900000	709900000
39915	Control	Tumor Burden	21	PD	251100	105500000	512700000	1403000000
39922	Control	Tumor Burden	30	PD	60040000	93330000	678600000	3173000000	6456000000
39913	Selinexor 15mg/kg 1x a week	Tumor Burden	23	PD	72420000	54740000	164900000	542900000
39920	Selinexor 15mg/kg 1x a week	Tumor Burden	49	PD	2779000	150300	19890000	32520000	277000000	419500000	1990000000	4843000000
39928	Selinexor 15mg/kg 1x a week	Tumor Burden	29	PD	3029000	30640000	225900000	713200000	2769000000
39912	Selinexor 15mg/kg 1x a week	Tumor Burden	30	PD	24190000	71060000	146000000	1364000000	5221000000
39929	Selinexor 15mg/kg 1x a week	Tumor Burden	29	PD	1058000	43580000	216600000	925200000	396200000
39931	Selinexor 15mg/kg 1x a week	Tumor Burden	29	PD	29410000	20610000	277200000	1175000000	4753000000
39914	Idasanutlin	Tumor Burden	43	PD	2652000	16340000	71250000	413000000	2082000000	2461000000	3872000000
39923	Idasanutlin	Tumor Burden	26	PD	5818000	8041000	44260000	203700000
39932	Idasanutlin	Tumor Burden	26	PD	4581000	10390000	39740000	273300000
39918	Idasanutlin	Tumor Burden	23	PD	22000000	5905000	465600000	966100000
39933	Idasanutlin	Tumor Burden	28	PD	21970000	29590000	128100000	416500000
39934	Idasanutlin	Tumor Burden	42	PD	1529000	54440000	579700000	2122000000	5583000000	4311000000
39916	Selinexor 1x a week + Idasanutlin	Tumor Burden	49	PD	4332000	4451000	13050000	56980000	441400000	506100000	947200000	8456000000
39925	Selinexor 1x a week + Idasanutlin	Tumor Burden	52	PD	4214000	1507000	46880000	150300000	104100000	1115000000	1680000000	4558000000
39930	Selinexor 1x a week + Idasanutlin	Tumor Burden	52	PD	1783000	2095000	4702000	9241000	1438000	57580000	174200000	466300000
39919	Selinexor 1x a week + Idasanutlin	Tumor Burden	43	PD	43600000	33550000	56520000	234500000	1196000000	71070000	2776000000
39921	Selinexor 1x a week + Idasanutlin	Tumor Burden	42	PD	12210000	20840000	21280000	86100000	590300000	713200000	1528000000
39924	Selinexor 1x a week + Idasanutlin	Tumor Burden	29	PD	11190000	1032000	88050000	227200000	1079000000
1: Treatment groups (4 cycles planned, all schedules based on a 28 day cycle)
Vehicle = Selinexor vehicle administered once weekly (Thursday) [0 mg/ml]
Selinexor 15 mg/kg 1x a week = Selinexor dosed at 15 mg/kg oral gavage once a week (Thursday) for first 3 weeks of 4 week cycle [3 mg/ml]
Idasanutlin = Idasanutlin dosed at 150 mg/kg oral gavage twice daily on days 1-5 for first week of 4 week cycle [15 mg/ml]
Selinexor 1x a week + Idasanutlin = Selinexor dosed at 15 mg/kg oral gavage once a week (Thursday) for first 3 weeks of 4 week cycle [3 mg/ml] and Idasanutlin dosed at 150 mg/kg oral gavage twice daily on days 1-5 for first 3 weeks of 4 week cycle [15 mg/ml]
2: Xenogen imaging
All bioluminescence signals are measured in photons/sec/cm2/sr.

## Sheet: SJATRTMYC-18-10115
Supplementary Table S2D. Preclinical study using selinexor and idasanutlin in SJATRTMYC-18-10115 (SJ1810115) xenograft models with low tumor burden.
Mouse ID	1Treatment Group	Reason Off Study	Tx Duration (Days)	Response	2Enrollment Course 1 wk 1	Course 1 wk 2	Course 1 wk 3	Course 1 wk 4	Course 2 wk 1	Course 2 wk 2	Course 2 wk 3	Course 2 wk 4	Course 3 wk 1	Course 3 wk 2	Course 3 wk 3	Course 3 wk 4	Course 4 wk 1	Course 4 wk 2	Course 4 wk 3	End of Study Course 4 wk 4	Week 17	Week 18	Week 19	Week 20	Week 21
1	Control	Tumor Burden	22	PD	3680000	297500000	2599000000	12700000000
2	Control	Tumor Burden	22	PD	6094000	204300000	1487000000	3085000000
3	Control	Tumor Burden	27	PD	1326000	36680000	412400000	1511000000
4	Control	Tumor Burden	27	PD	1633000	12500000	82300000	697000000
5	Control	Tumor Burden	36	PD	1029000	10850000	36920000	300500000	739000000	1194000000
6	Control	Tumor Burden	18	PD	7998000	54620000	231800000
7	Control	Tumor Burden	81	PD	865800	774800	1058000	2982000	3646000	6125000	9096000	21580000	32410000	51880000	81560000	107000000
8	Selinexor 15mg/kg 1x a week	Tumor Burden	22	PD	7606000	118200000	76750000	3554000000
9	Selinexor 15mg/kg 1x a week	Tumor Burden	59	PD	1301000	1832000	3917000	9638000	14280000	83060000	159000000	1185000000	3028000000
10	Selinexor 15mg/kg 1x a week	Tumor Burden	71	PD	1440000	242000	256900	633900	705700	807000	2595000	10350000	78660000	225300000	842600000
11	Selinexor 15mg/kg 1x a week	Tumor Burden	29	PD	1164000	6012000	21330000	271800000	604500000
12	Selinexor 15mg/kg 1x a week	Tumor Burden	50	PD	1897000	10850000	14020000	31250000	117400000	280000000	531100000	1652000000
13	Selinexor 15mg/kg 1x a week	Tumor Burden	22	PD	4202000	245300000	3390000000	16680000000
14	Selinexor 15mg/kg 1x a week	Tumor Burden	29	PD	1195000	10400000	61600000	240000000	3231000000
15	Selinexor 15mg/kg 1x a week	Tumor Burden	30	PD	992700	2785000	14530000	131500000	2239000000
16	Selinexor 15mg/kg 1x a week	Moribund, seizure	37	PD	7123000	16370000	45470000	46400000	234900000	982800000
17	Idasanutlin	Tumor Burden	70	PD	1491000	1114000	14850000	55340000	149900000	80870000	388700000	1164000000	5488000000	2574000000	7217000000
18	Idasanutlin	Tumor Burden	43	PD	5521000	3353000	75660000	274900000	435800000	118700000	819200000
19	Idasanutlin	Tumor Burden	44	PD	1226000	2216000	22000000	87430000	275700000	278800000	615400000
20	Idasanutlin	Tumor Burden	60	PD	1003000	853900	3757000	10310000	12760000	3180000	10610000	25670000	79120000
21	Idasanutlin	Tumor Burden	49	PD	933900	483100	4556000	46160000	239500000	190400000	1628000000	2169000000
22	Idasanutlin	Tumor Burden	50	PD	2164000	1116000	6156000	37530000	288600000	100300000	306000000	6709000
23	Idasanutlin	Tumor Burden	50	PD	1199000	1435000	32160000	138600000	231000000	138400000	591000000	1300000000
24	Idasanutlin	Moribund, seizure	31	PD	2198000	2633000	13070000	130600000	625900000
25	Idasanutlin	Completed Therapy	112	CT; PD	6806000	301000	612200	2316000	8369000	2500000	3709000	10210000	18070000	3293000	3032000	10190000	18220000	3818000	12420000	43810000	138200000	271100000	310500000	487200000
26	Selinexor 1x a week + Idasanutlin	Tumor Burden	50	PD	4149000	748200	4797000	64490000	241400000	75770000	361500000	627100000
27	Selinexor 1x a week + Idasanutlin	Tumor Burden	44	PD	1268000	931700	2827000	42220000	244700000	30200000	356400000
28	Selinexor 1x a week + Idasanutlin	Completed Therapy	112	CT; SD	956200	305500	502100	1694000	4573000	1090000	1997000	1058000	1723000	549300	319100	267700	306300	223000	245900	234800	461500	1221000	1267000	3190000
29	Selinexor 1x a week + Idasanutlin	Tumor Burden	58	PD	1607000	178500	504400	2593000	7313000	2066000	203300000	843100000	5854000000
30	Selinexor 1x a week + Idasanutlin	Tumor Burden	44	PD	7580000	1394000	76090000	843800000	9666000000	1758000000	8730000000
31	Selinexor 1x a week + Idasanutlin	Completed Therapy	112	CT; PD	1408000	303300	739100	9051000	69860000	7879000	5891000	10240000	72690000	10720000	17850000	29360000	228400000	82980000	188600000	747800000	2043000000	4424000000
32	Selinexor 1x a week + Idasanutlin	Completed Therapy	112	CT; CR	3231000	3676000	1140000	1218000	19650000	304300	148800	216600	128800	114000	101100	125100	69290	73990	92960	103000	110800	116500	69350	42670	56600
33	Selinexor 1x a week + Idasanutlin	Tumor Burden	56	PD	1161000	576000	1022000	2067000	10560000	6587000	19040000	67070000	385400000
34	Selinexor 1x a week + Idasanutlin	Completed Therapy	112	CT; CR	1517000	1081000	5378000	27450000	40270000	7862000	237800	115400	89350	83000	783400	101200	71610	33290	100800	105200	67250	65120	76500	67620
1: Treatment groups (4 cycles planned, all schedules based on a 28 day cycle)
Vehicle = Selinexor vehicle administered once weekly (Thursday) [0 mg/ml]
Selinexor 15 mg/kg 1x a week = Selinexor dosed at 15 mg/kg oral gavage once a week (Thursday) for first 3 weeks of 4 week cycle [3 mg/ml]
Idasanutlin = Idasanutlin dosed at 150 mg/kg oral gavage twice daily on days 1-5 for first week of 4 week cycle [15 mg/ml]
Selinexor 1x a week + Idasanutlin = Selinexor dosed at 15 mg/kg oral gavage once a week (Thursday) for first 3 weeks of 4 week cycle [3 mg/ml] and Idasanutlin dosed at 150 mg/kg oral gavage twice daily on days 1-5 for first 3 weeks of 4 week cycle [15 mg/ml]
2: Xenogen imaging
All bioluminescence signals are measured in photons/sec/cm2/sr.

## Sheet: SJATRTSHH-14-8191_LowTB
Supplementary Table S2E. Preclinical study using selinexor and idasanutlin in SJATRTSHH-14-8191 (SJ148191) xenograft models with low tumor burden.
Mouse ID	1Treatment Group	Reason Off Study	Tx Duration (Days)	Response	2Enrollment Course 1 wk 1	Course 1 wk 2	Course 1 wk 3	Course 1 wk 4	Course 2 wk 1	Course 2 wk 2	Course 2 wk 3	Course 2 wk 4	Course 3 wk 1	Course 3 wk 2	Course 3 wk 3	Course 3 wk 4	Course 4 wk 1	Course 4 wk 2	Course 4 wk 3	End of Study Course 4 wk 4	Week 17	Week 18
39401	Control	Tumor Burden	38	PD	138000	178000	705000	7160000	11300000	258000000	676000000
39402	Control	Completed Therapy	84	PD	151000	172000	1030000	6720000	7680000	50900000	229000000	727000000	1490000000	693000000	112000000	191000000	4.01e+08	1.68e+09	2.87e+09
39403	Control	Tumor Burden	80	PD	115000	503000	19400000	127000000	335000000	684000000	290000000	1880000000	4630000000	4110000000	7690000000	2.27e+09	3.8e+09
39404	Control	Tumor Burden	17	PD	136000	144000	390000	3300000
39416	Selinexor	Tumor Burden	32	PD	141000	169000	188000	1720000	39300000
39417	Selinexor	Completed Therapy	84	CT; SD	153000	133000	188000	150000	275000	251000	268000	323000	178000	289000	286000	653000	940000	125000	1350000	101000	84000	92300
39418	Selinexor	Completed Therapy	84	PD	126000	161000	375000	4710000	56300000	118000000	223000000	309000000	105000000	316000000	476000000	525000000	920000000	1640000000	2300000000
39419	Selinexor	Completed Therapy	84	CT; SD	127000	137000	160000	161000	219000	288000	277000	329000	215000	225000	469000	573000	776000	1190000	2300000	101000	104000	102000
39420	Selinexor	Completed Therapy	84	CT; SD	122000	106000	188000	128000	164000	164000	164000	230000	149000	104000	206000	248000	204000	39300	398000	106000	113000	92800
39411	Idasanutlin	Completed Therapy	84	CT; SD	107000	131000	135000	145000	117000	96000	102000	119000	114000	114000	128000	122000	101000	157000	157000	144000	119000	124000
39412	Idasanutlin	Completed Therapy	84	CT; SD	113000	148000	143000	116000	127000	131000	122000	148000	158000	139000	149000	121000	117000	178000	148000	180000	139000	150000
39413	Idasanutlin	Completed Therapy	84	PD	113000	138000	100000	115000	113000	109000	103000	107000	122000	119000	123000	101000	107000
39414	Idasanutlin	Completed Therapy	84	CT; SD	164000	176000	253000	161000	175000	201000	152000	152000	106000	156000	145000	125000	116000	220000	163000	132000	134000	131000
39415	Idasanutlin	Completed Therapy	84	CT; SD	107000	146000	132000	128000	114000	121000	113000	139000	121000	160000	146000	136000	121000	157000	149000	148000	120000	112000
39426	Selinexor 1x a week + Idasanutlin	Completed Therapy	84	PD	151000	125000	147000	136000	168000	205000	582000	1280000	5510000	17600000	45400000	98700000	95100000
39427	Selinexor 1x a week + Idasanutlin	Completed Therapy	84	CT; SD	166000	158000	149000	147000	132000	143000	159000	199000	190000	160000	150000	213000	241000	107000	108000	102000	118000	108000
39428	Selinexor 1x a week + Idasanutlin	Completed Therapy	84	CT; SD	179000	169000	141000	166000	135000	134000	131000	162000	161000	134000	125000	133000	147000	93600	132000	109000	125000	108000
39429	Selinexor 1x a week + Idasanutlin	Completed Therapy	84	CT; SD	161000	147000	163000	137000	131000	141000	155000	165000	173000	141000	122000	118000	161000	112000	118000	98300.1	126000	111000
39430	Selinexor 1x a week + Idasanutlin	Completed Therapy	84	CT; SD	196000	154000	127000	140000	147000	147000	137000	166000	123000	152000	127000	133000	129000	99600	126000	103000	117000	110000
1: Treatment groups (4 cycles planned, all schedules based on a 28 day cycle)
Vehicle = Selinexor vehicle administered once weekly (Thursday) [0 mg/ml]
Selinexor 15 mg/kg 1x a week = Selinexor dosed at 15 mg/kg oral gavage once a week (Thursday) for first 3 weeks of 4 week cycle [3 mg/ml]
Idasanutlin = Idasanutlin dosed at 150 mg/kg oral gavage twice daily on days 1-5 for first week of 4 week cycle [15 mg/ml]
Selinexor 1x a week + Idasanutlin = Selinexor dosed at 15 mg/kg oral gavage once a week (Thursday) for first 3 weeks of 4 week cycle [3 mg/ml] and Idasanutlin dosed at 150 mg/kg oral gavage twice daily on days 1-5 for first 3 weeks of 4 week cycle [15 mg/ml]
2: Xenogen imaging
All bioluminescence signals are measured in photons/sec/cm2/sr.

## Sheet: SJATRTSHH-14-8191_HighTB
Supplementary Table S2F. Preclinical study using selinexor and idasanutlin in SJATRTSHH-14-8191 (SJ148191) xenograft models with high tumor burden.
Mouse ID	1Treatment Group	Reason Off Study	Tx Duration (Days)	Response	2Enrollment Course 1 wk 1	Course 1 wk 2	Course 1 wk 3	Course 1 wk 4
39585	Control	Tumor Burden	8	PD	63100000	436000000
39586	Control	Tumor Burden	10	PD	61500000	286000000	2610000000
39587	Control	Tumor Burden	5	PD	1040000000	2860000000
39588	Control	Tumor Burden	7	PD	732000000	1300000000
39589	Control	Tumor Burden	5	PD	518000000	2820000000
39590	Control	Tumor Burden	8	PD	84000000	346000000
39591	Control	Tumor Burden	10	PD	1220000	726000000	4360000000
39592	Control	Tumor Burden	8	PD	2950000	468000000
39593	Control	Tumor Burden	10	PD	14500000	352000000	2790000000
39594	Control	Tumor Burden	5	PD	1020000000	3320000000
39555	Selinexor	Tumor Burden	6	PD	271000000	1070000000
39556	Selinexor	Tumor Burden	14	PD	208000000	609000000	1380000000
39557	Selinexor	Tumor Burden	8	PD	65800000	525000000
39558	Selinexor	Tumor Burden	8	PD	125000000	937000000
39559	Selinexor	Tumor Burden	9	PD	215000000	1490000000
39560	Selinexor	Tumor Burden	11	PD	98200000	393000000	1720000000
39561	Selinexor	Tumor Burden	8	PD	69500000	599000000
39562	Selinexor	Tumor Burden	11	PD	338000000	1400000000	2700000000
39563	Selinexor	Tumor Burden	14	PD	81200000	540000000	1720000000
39564	Selinexor	Tumor Burden	17	PD	90500000	416000000	1010000000
39535	Idasanutlin	Tumor Burden	10	PD	656000000	3590000000	6350000000
39536	Idasanutlin	Tumor Burden	18	PD	102000000	180000000	444000000
39537	Idasanutlin	Tumor Burden	10	PD	309000000	1150000000	3390000000
39538	Idasanutlin	Tumor Burden	14	PD	247000000	966000000	3080000000
39539	Idasanutlin	Tumor Burden	14	PD	440000000	1880000000	2920000000
39540	Idasanutlin	Tumor Burden	16	PD	333000000	670000000	2310000000
39541	Idasanutlin	Tumor Burden	17	PD	82600000	389000000	992000000
39542	Idasanutlin	Tumor Burden	11	PD	1340000	548000000	3120000000
39543	Idasanutlin	Tumor Burden	9	PD	75200000	268000000
39544	Idasanutlin	Tumor Burden	10	PD	472000000	2250000000	7150000000
39575	Selinexor 1x a week + Idasanutlin	Tumor Burden	11	PD	169000000	465000000	2850000000
39576	Selinexor 1x a week + Idasanutlin	Tumor Burden	15	PD	23500000	1100000000	2110000000
39577	Selinexor 1x a week + Idasanutlin	Tumor Burden	10	PD	143000000	732000000	4470000000
39578	Selinexor 1x a week + Idasanutlin	Tumor Burden	11	PD	378000000	1050000000	3950000000
39579	Selinexor 1x a week + Idasanutlin	Tumor Burden	16	PD	228000000	1150000000	1990000000
39580	Selinexor 1x a week + Idasanutlin	Tumor Burden	10	PD	126000000	116000000	5440000000
39581	Selinexor 1x a week + Idasanutlin	Tumor Burden	17	PD	135000000	245000000	1340000000
39582	Selinexor 1x a week + Idasanutlin	Tumor Burden	17	PD	96500000	494000000	1150000000
39583	Selinexor 1x a week + Idasanutlin	Tumor Burden	18	PD	106000000	401000000	1100000000
39584	Selinexor 1x a week + Idasanutlin	Tumor Burden	17	PD	3370000	724000000	1680000000
1: Treatment groups (4 cycles planned, all schedules based on a 28 day cycle)
Vehicle = Selinexor vehicle administered once weekly (Thursday) [0 mg/ml]
Selinexor 15 mg/kg 1x a week = Selinexor dosed at 15 mg/kg oral gavage once a week (Thursday) for first 3 weeks of 4 week cycle [3 mg/ml]
Idasanutlin = Idasanutlin dosed at 150 mg/kg oral gavage twice daily on days 1-5 for first week of 4 week cycle [15 mg/ml]
Selinexor 1x a week + Idasanutlin = Selinexor dosed at 15 mg/kg oral gavage once a week (Thursday) for first 3 weeks of 4 week cycle [3 mg/ml] and Idasanutlin dosed at 150 mg/kg oral gavage twice daily on days 1-5 for first 3 weeks of 4 week cycle [15 mg/ml]
2: Xenogen imaging
All bioluminescence signals are measured in photons/sec/cm2/sr.

## Sheet: SJATRTSHH-14-8191_CSI
Supplementary Table S2G. Preclinical study using radiation and idasanutlin in SJATRTSHH-14-8191 (SJ148191) xenograft models.
Mouse ID	1Treatment Group	Reason Off Study	Tx Duration (Days)	Response	2Enrollment Course 1 wk 1	Course 1 wk 2	Course 1 wk 3	Course 1 wk 4	Course 2 wk 1	Course 2 wk 2	Course 2 wk 3	Course 2 wk 4	Course 3 wk 1	Course 3 wk 2	Course 3 wk 3	Course 3 wk 4	Course 4 wk 1	Course 4 wk 2	Course 4 wk 3	End of Study Course 4 wk 4	Week 17	Week 18	Week 19
1	Control	Tumor Burden	21	PD	556000	16100000	79700000	725000000
2	Control	Tumor Burden	24	PD	822000	6050000	32900000	127000000
3	Control	Tumor Burden	10	PD	11100000	333000000
4	Control	Tumor Burden	28	PD	4200000	26400000	84200000	12600000	336000000
5	Control	Tumor Burden	16	PD	4460000	299000000	3670000000
6	Control	Tumor Burden	16	PD	16000000	122000000	1070000000
7	Control	Tumor Burden	28	PD	3210000	20800000	224000000	665000000	1030000000
8	Control	Tumor Burden	31	PD	3030000	23200000	98200000	200000000	767000000
9	Control	Tumor Burden	15	PD	28700000	221000000	867000000
10	CSI	Tumor Burden	51	PD	4470000	1140000	892000	662000	5180000	29400000	179000000	525000000
11	CSI	Tumor Burden	28	PD	8780000	23000000	36500000	1270000000	4910000000
12	CSI	Completed Therapy	112	CT; CR	742000	1860000	95800	107000	82300	77100	106000	103000	164000	82100	89800	72300	72600	58200	77200	66300	79700	84600	88000
13	CSI	Moribund, not due to tumor	81	-	1170000	72000	288000	138000	188000	1930000	4180000	4100000	2680000	118000	89300	50400
14	CSI	Moribund, not due to tumor	70	-	502000	587000	385000	202000	810000	5980000	23400000	60400000	171000000	172000000	391000000
15	CSI	Tumor Burden	25	PD	1350000	2780000	3660000	120000000
16	CSI	Tumor Burden	32	PD	23300000	28200000	17400000	101000000	899000000
17	CSI	Tumor Burden	37	PD	2800000	3530000	970000	20600000	276000000	1060000000
18	CSI	Tumor Burden	51	PD	27500000	8840000	7870000	6340000	3550000	6610000	32800000	188000000
19	CSI	Completed Therapy	112	CT; CR	754000	373000	273000	229000	123000	127000	95600	63900	82600	60800	61400	61100	55300	65700	79400	89900	98000	59600
20	Idasanutlin	Tumor Burden	23	PD	498000	5940000	54600000	1160000000
21	Idasanutlin	Tumor Burden	31	PD	856000	4330000	41300000	442000000
22	Idasanutlin	Tumor Burden	31	PD	2570000	8760000	64100000	282000000	437000000
23	Idasanutlin	Tumor Burden	16	PD	18500000	118000000	1450000000
24	Idasanutlin	Tumor Burden	29	PD	854000	2410000	20500000	119000000	196000000
25	Idasanutlin	Tumor Burden	31	PD	1920000	7440000	83100000	553000000	1370000000
26	Idasanutlin	Tumor Burden	25	PD	15800000	81800000	164000000	1190000000
27	Idasanutlin	Tumor Burden	25	PD	3620000	17300000	256000000	585000000
28	Idasanutlin	Tumor Burden	32	PD	4260000	36800000	359000000	2770000000	3300000000
29	Idasanutlin	Tumor Burden	7	PD	9350000
30	CSI + Idasanutlin	Moribund, not due to tumor	73	-	7680000	789000	579000	311000	236000	221000	775000	3180000	14200000	28500000	58400000
31	CSI + Idasanutlin	Completed Therapy	112	CT; CR	1380000	210000	154000	122000	107000	124000	121000	109000	126000	102000	105000	137000	70000	76500	93400	105000	72700	72000	87900
32	CSI + Idasanutlin	Tumor Burden	112	CT; PD	4390000	2560000	1080000	622000	219000	197000	207000	220000	583000	2160000	2850000	2760000	4390000	7960000	19100000	84000000	361000000	1300000000
33	CSI + Idasanutlin	Tumor Burden	70	PD	7830000	304000	212000	136000	119000	298000	741000	5000000	2680000	78800000	260000000
34	CSI + Idasanutlin	Tumor Burden	70	PD	1820000	958000	422000	220000	123000	114000	621000	3240000	23300000	109000000	532000000
35	CSI + Idasanutlin	Tumor Burden	73	PD	10700000	1970000	1090000	1090000	408000	669000	1030000	5610000	73300000	219000000	1130000000
36	CSI + Idasanutlin	Moribund, not due to tumor	81	-	4110000	1570000	1010000	554000	131000	130000	129000	157000	108000	108000	103000	104000
37	CSI + Idasanutlin	Completed Therapy	112	CT; CR	3950000	1040000	631000	294000	152000	188000	147000	124000	145000	187000	157000	112000	115000	115000	106000	90300	102000	106000	110000
38	CSI + Idasanutlin	Tumor Burden	67	PD	4320000	220000	146000	162000	311000	3450000	5730000	6300000	28400000	164000000
39	CSI + Idasanutlin	Moribund, not due to tumor	85	-	733000	106000	115000	161000	118000	73900	125000	114000	110000	102000	103000	103000	118000
1: Treatment groups (1 cycle planned, all schedules based on a 28 day cycle)
Vehicle = Selinexor vehicle, twice weekly [0mg/ml]* Control = Vehicle, oral gavage twice daily, days 1-5 for 1 cycle
Idasanutlin = Idasanutlin, 150 mg/kg oral gavage twice daily on days 1-5 for first week of a 2 week cycle [15 mg/ml]
2 Gy/ day (M-F) x 2 weeks for cumulative dose of 20 Gy
CSI + Idasanutlin = 2 Gy/day (M-F) x 2 weeks and Idasanutlin, 150mg/kg oral gavage twice daily on days 1-5 for first week of 2 week cycle [15 mg/ml]
2: Xenogen imaging
All bioluminescence signals are measured in photons/sec/cm2/sr.
