# Supplementary material for: Targeting the p53 pathway to treat Malignant Rhabdoid and Atypical Teratoid Rhabdoid Tumors
Source: Research Square preprint supplement (doi:10.21203/rs.3.rs-2094243/v1), 2022-10-06
Supplement: Supplementary file 2 [file 69f383206896fc62286c7d7d.xlsx]

## Sheet: Table S1
Supplementary Table S1. Selinexor and idasanutlin AUC values
Model	TumorType	SEL AUC	IDA AUC	AUC(IDA - SEL)
NB1691	MDM2-amplified Neuroblastoma	0.416127	0.544116	0.127989
SJSA1	MDM2-amplified Osteosarcoma	0.333921	0.442274	0.108353
TTC642	Malignant Rhabdoid Tumor	0.394203	0.470618	0.076415
TB148191	Atypical Teratoid Rhabdoid Tumor	0.43	0.5	0.07
CHLA05	Atypical Teratoid Rhabdoid Tumor	0.447593	0.47183	0.0242363
CHLA02	Atypical Teratoid Rhabdoid Tumor	0.424965	0.448375	0.0234105
BT16	Atypical Teratoid Rhabdoid Tumor	0.347356	0.359894	0.0125383
G401	Malignant Rhabdoid Tumor	0.484286	0.486597	0.00231178
CHLA266	Atypical Teratoid Rhabdoid Tumor	0.579293	0.530136	-0.0491572
A204	Malignant Rhabdoid Tumor	0.40573	0.307982	-0.097748
BT12	Atypical Teratoid Rhabdoid Tumor	0.425592	0.0948878	-0.330704
AUC =area-under-the-concentration-curve; SEL= selinexor; IDA= idasanutlin
