# Supplementary material for: Targeting the p53 pathway to treat Malignant Rhabdoid and Atypical Teratoid Rhabdoid Tumors
Source: Research Square preprint supplement (doi:10.21203/rs.3.rs-2094243/v1), 2022-10-06
Supplement: Supplementary file 3 [file 71c669e131bba039687d9f69.xlsx]

## Sheet: Table 1. In vivo efficacy
Table 1. Summary of in vivo efficacy studies.
Model	Treatment	Median survival (days)	P value (vs. vehicle only)	Summary of Response
A204	Vehicle	58	–	7 PD
A204	Idasanutlin	80	0.0729	4 PD; 1 CT/SD; 2 CT/CR
A204	Selinexor 10mg/kg (biw)	80	0.0807	4 PD; 1 CT/CR
A204	Selinexor 15mg/kg (qw)	72	0.2462	5 PD; 2 CT/PD
A204	Selinexor(qw) + Idasanutlin	103	0.098	4 PD; 1 CT/CR
A204	Selinexor(biw) + Idasanutlin	72	0.134	4 PD; 2 CT/PD
TTC642	Vehicle	26	–	7 PD
TTC642	Idasanutlin	43	0.0289	6 PD; 1 CT/PD
TTC642	Selinexor 10mg/kg (biw)	68	0.0152	5 PD; 1 CT/PD
TTC642	Selinexor 15mg/kg (qw)	26	0.4795	6 PD
TTC642	Selinexor(qw) + Idasanutlin	NR	0.002	3 PD; 2 CT/PD; 2 CT/CR
TTC642	Selinexor(biw) + Idasanutlin	NR	0.0008	2 PD; 2 CT/PD; 2 CT/CR
BT16	Vehicle	21	–	6 PD
BT16	Idasanutlin	27	0.1313	6 PD
BT16	Selinexor 15mg/kg (qw)	29	0.0685	6 PD
BT16	Selinexor(qw) + Idasanutlin	46	0.0015	6 PD
SJ148191 Low TB	Vehicle	70	–	4 PD
SJ148191 Low TB	Idasanutlin	NR	0.015	1 PD; 4 CT/SD
SJ148191 Low TB	Selinexor 15mg/kg (qw)	NR	0.0641	2 PD; 3 CT/SD
SJ148191 Low TB	Selinexor(qw) + Idasanutlin	NR	0.015	1 PD; 4 CT/SD
SJ148191 High TB	Vehicle	8	–	10 PD
SJ148191 High TB	Idasanutlin	12.5	0.0006	10 PD
SJ148191 High TB	Selinexor 15mg/kg (qw)	10	0.0237	10 PD
SJ148191 High TB	Selinexor(qw) + Idasanutlin	15.5	<0.0001	10 PD
SJ1810115	Vehicle	27	–	7 PD
SJ1810115	Idasanutlin	50	0.0657	8 PD; 1 CT/PD
SJ1810115	Selinexor 15mg/kg (qw)	30	0.6059	9 PD
SJ1810115	Selinexor(qw) + Idasanutlin	58	0.0029	5 PD; 1 CT/PR; 1 CT/PD; 2 CT/CR
SJ148191 CSI	Vehicle	21	–	9 PD
SJ148191 CSI	Idasanutlin	27	0.1091	10 PD
SJ148191 CSI	CSI	51	<0.001	6 PD; 2 CT/CR
SJ148191 CSI	CSI + Idasanutlin	NR	<0.0001	4 PD; 1 CT/PD; 2 CT/CR
PD, progressive disease; CT/PD, completed therapy with progressive disease; CT/SD, completed therapy with stable disease; CT/CR, completed therapy with complete response; NR, not reached
