# Supplementary material for: Targeting the p53 pathway to treat Malignant Rhabdoid and Atypical Teratoid Rhabdoid Tumors
Source: Research Square preprint supplement (doi:10.21203/rs.3.rs-2094243/v1), 2022-10-06
Supplement: Supplementary file 4 [file 77973f824e35b404307deaef.xlsx]

## Sheet: S3A
Supplementary Table S3A. Antibodies used in this study.
Name	Catalog Number	Company	Species, Clone#	Dilution
p53	OP43	Millipore	Mouse, #DO-1
p53	2524S	CST	Mouse	500
phospho-p53 (ser15)	9284	CST	Rabbit	1000
p21 (Waf1, Cip1)	2947	Cell signaling	Rabbit, #12D1
MDM2	OP46	Millipore	Mouse, #1F2
MDM2	AB16895	ABCAM	Mouse	5000
XPO1	NB100-79802	Novus Biological	Rabbit	4000
SNF5	612111	BD Transduction Lab	Mouse, #25
GAPDH	5174	Cell signaling	Rabbit	5000
MDMX (MDM4)	04-1555	Millipore	Mouse	2000

## Sheet: S3B
Supplementary Table S3B. TaqMan probes used for qPCR studies.
Name	TaqMan Assay ID	Catalog Number	Company
CDKN1A (p21)	Hs00355782_m1	4331182	Applied Biosystems
MDM2	Hs01066930_m1	4331182	Applied Biosystems
XPO-1 (CRM-1)	Hs00185645_m1	4331182	Applied Biosystems
BBC3 (PUMA)	Hs00248075_m1	4331182	Applied Biosystems
GAPDH	Hs02758991_g1	4331182	Applied Biosystems
